# Supplementary material for: Investigating the Contribution of Drug-Metabolizing Enzymes in Drug-Drug Interactions of Dapivirine and Miconazole
Source: MDPI journal article supplement (doi:10.3390/pharmaceutics13122193), 2021-12-18
Supplement: s1 [file s1]

# Supplementary Materials: Investigating the Contribution of Drug-Metabolizing Enzymes in Drug-Drug Interactions of Dapivirine and Miconazole

Guru Raghavendra Valicherla, Phillip Graebing, Junmei Zhang, Ruohui Zheng, Jeremy Nuttall, Peter Silvera and Lisa Cencia Rohan

## Supplementary information

### Supplementary tables:

**Table S1.** MRM transitions of DPV, substrates, metabolites, and internal standards.

| Compound               | Precursor | Product | ESI Polarity | Collision energy(eV) |
|------------------------|-----------|---------|--------------|----------------------|
| Dapivirine             | 330.11    | 158.05  | +            | 24                   |
| d4-Dapivirine (I.S.)   | 334.13    | 158.89  | +            | 32                   |
| Phenacetin             | 180.1     | 138.05  | +            | 10                   |
| Acetaminophen          | 152.1     | 110.05  | +            | 16                   |
| 7-Ethoxyresorufin      | 242.023   | 214.058 | +            | 22                   |
| Resorufin              | 214.03    | 214.03  | +            | 31                   |
| Bupropion              | 240.1     | 184.2   | +            | 8                    |
| Hydroxybupropion       | 256.1     | 238.05  | +            | 11                   |
| Amodiaquine            | 356.2     | 283.1   | +            | 21                   |
| d10-Amodiaquine (I.S.) | 366.2     | 289.2   | +            | 20                   |
| N-Desethylamodiaquine  | 328.24    | 283.1   | +            | 16                   |
| (S)-Mephénytoin        | 218.963   | 134.13  | +            | 20                   |
| Hydroxymephénytoin     | 235.027   | 133.091 | +            | 20                   |
| Midazolam              | 326.05    | 291.05  | +            | 25                   |

|                                    |         |         |   |    |
|------------------------------------|---------|---------|---|----|
| 1'-hydroxymidazolam                | 341.94  | 324.08  | + | 25 |
| Orphenadrine HCl (I.S.)            | 270.2   | 181.1   | + | 12 |
| Telmisartan (I.S.)                 | 515.2   | 276.0   | + | 48 |
| Telmisartan (I.S.)                 | 513.27  | 287.12  | – | 36 |
| SN-38                              | 393.10  | 349.05  | + | 25 |
| SN-38 glucuronide                  | 569.243 | 393.198 | + | 27 |
| Chenodeoxycholic acid              | 391.3   | 391.3   | – | 8  |
| Chenodeoxycholic acid glucuronide  | 567.35  | 113.04  | – | 26 |
| Trifluoperazine                    | 408.06  | 141.13  | + | 28 |
| Trifluoperazine glucuronide        | 584.21  | 408.16  | + | 26 |
| 4-methyl umbelliferone             | 176.947 | 77.02   | + | 24 |
| 4-methyl umbelliferone glucuronide | 353.067 | 177.043 | + | 53 |
| Mycophenolic acid                  | 320.98  | 206.94  | + | 34 |
| Mycophenolic acid glucuronide      | 519.27  | 343.211 | + | 31 |
| Zidovudine                         | 266.08  | 223.034 | + | 10 |
| Zidovudine glucuronide             | 444.09  | 126.89  | + | 21 |
| Propofol glucuronide (I.S.)        | 353.17  | 177.131 | – | 26 |

**Table S2.** Incubation conditions used for the reaction phenotyping assays.

| <b>Enzyme</b>        | <b>Protein concentration</b> | <b>Substrate concentration</b>     |
|----------------------|------------------------------|------------------------------------|
| <b>rCYP1A1</b>       | 100 pmol/mL                  | Phenacetin (10 $\mu$ M)            |
| <b>rCYP1A2</b>       | 10 pmol/mL                   | Phenacetin (10 $\mu$ M)            |
| <b>rCYP1B1</b>       | 10 pmol/mL                   | 7-ethoxyresorufin (1 $\mu$ M)      |
| <b>rCYP2B6</b>       | 10 pmol/mL                   | Bupropion (10 $\mu$ M)             |
| <b>rCYP2C8</b>       | 10 pmol/mL                   | Amodiaquine (0.5 $\mu$ M)          |
| <b>rCYP2C19</b>      | 10 pmol/mL                   | Mephenytoin (20 $\mu$ M)           |
| <b>rCYP3A4</b>       | 10 pmol/mL                   | Midazolam (1 $\mu$ M)              |
| <b>HLM (Phase 1)</b> | 1 mg/mL                      | Midazolam (1 $\mu$ M)              |
| <b>rUGT1A1</b>       | 0.1 mg/mL                    | SN38 (0.5 $\mu$ M)                 |
| <b>rUGT1A3</b>       | 0.4 mg/mL                    | Chenodeoxycholic acid (2 $\mu$ M)  |
| <b>rUGT1A4</b>       | 0.2 mg/mL                    | Trifluoperazine (0.5 $\mu$ M)      |
| <b>rUGT1A6</b>       | 0.5 mg/mL                    | 4-methylumbelliferone (2 $\mu$ M)  |
| <b>rUGT1A7</b>       | 0.075 mg/mL                  | 4-methylumbelliferone (10 $\mu$ M) |
| <b>rUGT1A8</b>       | 2 mg/mL                      | 4-methylumbelliferone (2 $\mu$ M)  |
| <b>rUGT1A9</b>       | 0.1 mg/mL                    | Mycophenolic acid (0.2 $\mu$ M)    |
| <b>rUGT2B7</b>       | 2 mg/mL                      | Zidovudine (10 $\mu$ M)            |
| <b>HLM (Phase 2)</b> | 1 mg/mL                      | 4-methylumbelliferone (2 $\mu$ M)  |

**Table S3.** Incubation conditions used for the enzyme inhibition assays.

| <b>Enzyme</b>  | <b>Protein (concentration)</b> | <b>Substrate (concentration)</b>   | <b>Incubation time<br/>(min)</b> |
|----------------|--------------------------------|------------------------------------|----------------------------------|
| <b>CYP1A1</b>  | Recombinant (50 pmol/mL)       | Phenacetin (10 $\mu$ M)            | 15                               |
| <b>CYP1A2</b>  | HLM (0.4 mg/mL)                | Phenacetin (10 $\mu$ M)            | 15                               |
| <b>CYP1B1</b>  | Recombinant (5 pmol/mL)        | 7-ethoxyresorufin (1 $\mu$ M)      | 10                               |
| <b>CYP2B6</b>  | HLM (0.2 mg/mL)                | Bupropion (10 $\mu$ M)             | 15                               |
| <b>CYP2C8</b>  | HLM (0.02 mg/mL)               | Amodiaquine (0.5 $\mu$ M)          | 5                                |
| <b>CYP2C19</b> | HLM (0.9 mg/mL)                | Mephenytoin (20 $\mu$ M)           | 60                               |
| <b>CYP3A4</b>  | HLM (0.1 mg/mL)                | Midazolam (1 $\mu$ M)              | 5                                |
| <b>UGT1A1</b>  | HLM (0.2 mg/mL)                | SN38 (0.5 $\mu$ M)                 | 15                               |
| <b>UGT1A3</b>  | HLM (0.2 mg/mL)                | Chenodeoxycholic acid (2 $\mu$ M)  | 15                               |
| <b>UGT1A4</b>  | HLM (0.2 mg/mL)                | Trifluoperazine (0.5 $\mu$ M)      | 30                               |
| <b>UGT1A6</b>  | Recombinant (0.2 mg/mL)        | 4-methylumbelliferone (2 $\mu$ M)  | 5                                |
| <b>UGT1A7</b>  | Recombinant (0.075 mg/mL)      | 4-methylumbelliferone (10 $\mu$ M) | 15                               |
| <b>UGT1A8</b>  | Recombinant (1 mg/mL)          | 4-methylumbelliferone (2 $\mu$ M)  | 45                               |
| <b>UGT1A9</b>  | HLM (0.1 mg/mL)                | Mycophenolic acid (0.2 $\mu$ M)    | 10                               |
| <b>UGT2B7</b>  | HLM (0.4 mg/mL)                | Zidovudine (10 $\mu$ M)            | 60                               |

**Table S4.** Donor information of cryopreserved primary human hepatocytes used for the induction assays.

| <b>Donor information</b> | <b>HU2036 (Donor 1)</b>         | <b>HU8373 (Donor 2)</b>                                               | <b>HU2068 (Donor 3)</b> |
|--------------------------|---------------------------------|-----------------------------------------------------------------------|-------------------------|
| Sex                      | Male                            | Female                                                                | Male                    |
| Race                     | Caucasian                       | Caucasian                                                             | Caucasian               |
| Age                      | 71                              | 26                                                                    | 66                      |
| BMI                      | 27.76                           | 18.6                                                                  | 40.58                   |
| Tobacco history          | 0.5-1 ppd                       | 1ppd x 3-4 yr                                                         | None                    |
| Alcohol history          | None                            | 2-4 drinks/month                                                      | 1 beer weekly           |
| Drug history             | None                            | Cocaine 3x in 2019,<br>cannabis daily,<br>MDMA +LSD in high<br>school | None                    |
| Cause of death           | N/A                             | Asphyxiation                                                          | N/A                     |
| Other                    | Metastatic colorectal<br>cancer | N/A                                                                   | Metastatic tumor        |

**Table S5.** Primer sequences used for real time RT-PCR of human CYP enzymes.

| <b>Gene Name</b> | <b>GeneBank Accession no.</b> | <b>Primer sequence 5' to 3'</b>            |
|------------------|-------------------------------|--------------------------------------------|
| CYP1A2           | NM_000761                     | Forward-CTTTGACAAGAACAGTGTCCG              |
|                  |                               | Reverse-AGTGTCCAGCTCCTTCTGGAT              |
| CYP2B6           | NM_000767                     | Forward-GCACTCCTCACAGGACTCTTG              |
|                  |                               | Reverse-CCCAGGTGTACCGTGAAGAC               |
| CYP3A4           | NM_017460                     | Forward-CCTTACACATACACACCCTTTGGAAGT        |
|                  |                               | Reverse-<br>AGCTCAATGCATGATCAGAATCCCCGGTTA |
| GAPDH            | NM_001256799                  | Forward-GGAGCGAGATCCCTCCAAAAT              |
|                  |                               | Reverse-GGCTGTTGTCATACTTCTCATGG            |

## Supplementary Figures:

210211-CYP3A4-d035 Smooth(Mn,4x3)  
HLMDPV 60min R1 40

F1:MRM of 1 channel,ES+  
330.113 > 158.051  
1.028e+007

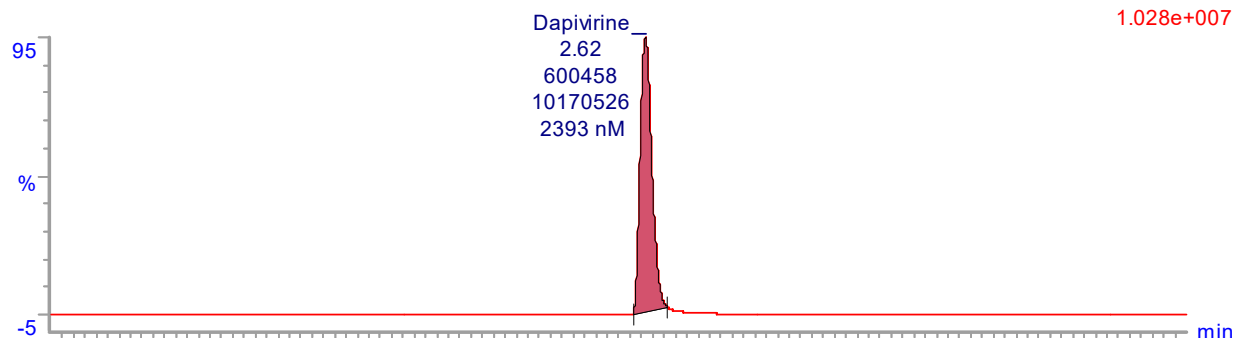

210211-CYP3A4-d035 Smooth(Mn,4x3)  
HLMDPV 60min R1 40

F2:MRM of 1 channel,ES+  
334.138 > 158.899  
2.079e+005

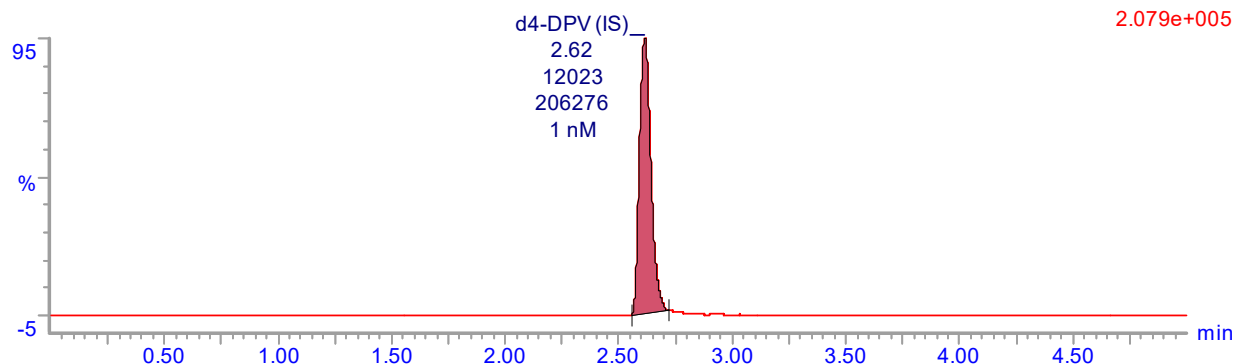

**Figure S1.** Representative LC-MS/MS chromatograms of DPV and I.S. (d4-DPV).

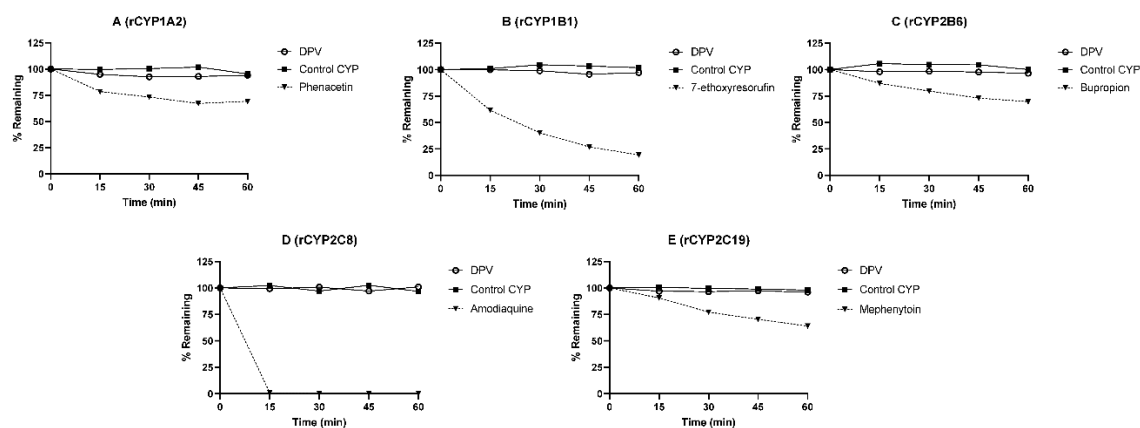

**Figure S2.** Metabolism of DPV using reaction phenotyping in CYP enzymes. **A)** rCYP1A2, **B)** rCYP1B1, **C)** rCYP2B6, **D)** rCYP2C8, and **E)** rCYP2C19 enzymes. Each test compound/substrate was incubated in a separate incubation mixture. Data are shown as the mean of two biological replicates.

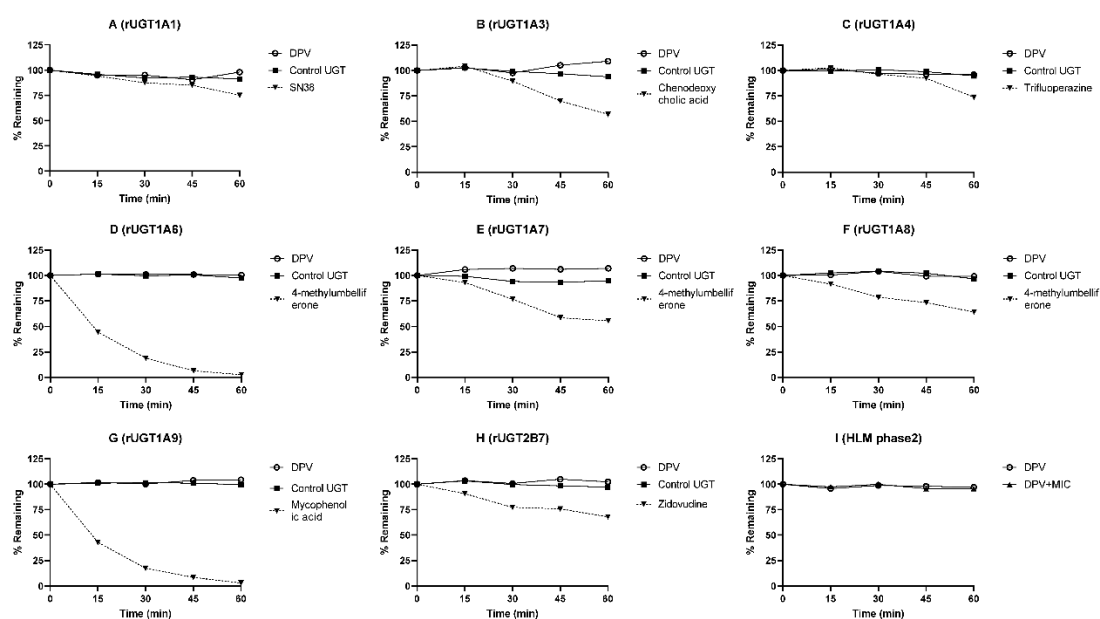

**Figure S3.** Metabolism of DPV using reaction phenotyping in UGT enzymes. **A)** rUGT1A1, **B)** rUGT1A3, **C)** rUGT1A4, **D)** rUGT1A6, **E)** rUGT1A7, **F)** rUGT1A8, **G)** rUGT1A9, **H)** rUGT2B7 and **I)** HLM (phase 2) enzymes. For HLM (phase 2) enzymes, DPV metabolism was also evaluated in the presence of MIC. Each test compound/substrate was incubated in a separate incubation mixture. Data are shown as the mean of two biological replicates.
